# Supplementary material for: Bisphenol analogues differently affect human islet polypeptide amyloid formation
Source: Royal Society of Chemistry journal article supplement (doi:10.1039/c5ra21792j), 2016-01-01
Supplement: c5ra21792j1.pdf [file c5ra21792j1.pdf]

**Supplementary Information**

*for*

**Bisphenol analogues differentially affect human islet polypeptide amyloid formation**

Lizi Huang<sup>a</sup>, Mingyan Liao<sup>a</sup>, Xin Yang<sup>a</sup>, Hao Gong<sup>a</sup>, Liang Ma<sup>a</sup>, Yudan Zhao<sup>a</sup>,

Kun Huang<sup>a, b\*</sup>

<sup>a</sup>Tongji School of Pharmacy, Huazhong University of Science and Technology, Wuhan,  
China, 430030

<sup>b</sup>Center for Biomedicine Research, Wuhan Institute of Biotechnology, Wuhan, China,  
430075

Corresponding author

Kun Huang, Ph.D.

Tongji School of Pharmacy

Huazhong University of Science and Technology

Wuhan, China, 430030

[kunhuang2008@hotmail.com](mailto:kunhuang2008@hotmail.com)

Table S1. Aggregator Advisor<sup>a</sup> prediction and DLS measurements of tested bisphenol analogue

| Compounds | cLogP <sup>b</sup> | Similarity to previously reported aggregator b | DLS detection   |     |     |      |
|-----------|--------------------|------------------------------------------------|-----------------|-----|-----|------|
|           |                    |                                                | 0 h             | 1 h | 2 h | 24 h |
| BPA       | 3.4                | 71%                                            | ND <sup>c</sup> | ND  | ND  | ND   |
| BPB       | 3.4                | /                                              | ND              | ND  | ND  | ND   |
| BPF       | 2.9                | /                                              | ND              | ND  | ND  | ND   |
| BPS       | 1.8                | /                                              | ND              | ND  | ND  | ND   |
| BPAF      | 4.5                | /                                              | ND              | ND  | ND  | ND   |
| BPAP      | 4.6                | 71%                                            | ND              | ND  | ND  | ND   |
| TBBPA     | 6.8                | 71%                                            | ND              | ND  | ND  | ND   |
| TCBPA     | 6.3                | /                                              | ND              | ND  | BD  | ND   |

<sup>a</sup> Aggregator Advisor is a free service to suggest molecules that aggregate or may aggregate under biochemical assay conditions (<http://advisor.bkslab.org/>).

<sup>b</sup> CLogP and Similarity to previously reported aggregator are calculated by Aggregator Advisor.

<sup>c</sup> “ND” means no aggregates detected by DLS after 24 h incubation (100  $\mu$ M bisphenols incubate with 25 mM PBS Buffer, containing 50 mM NaCl, pH 7.4, 25°C).

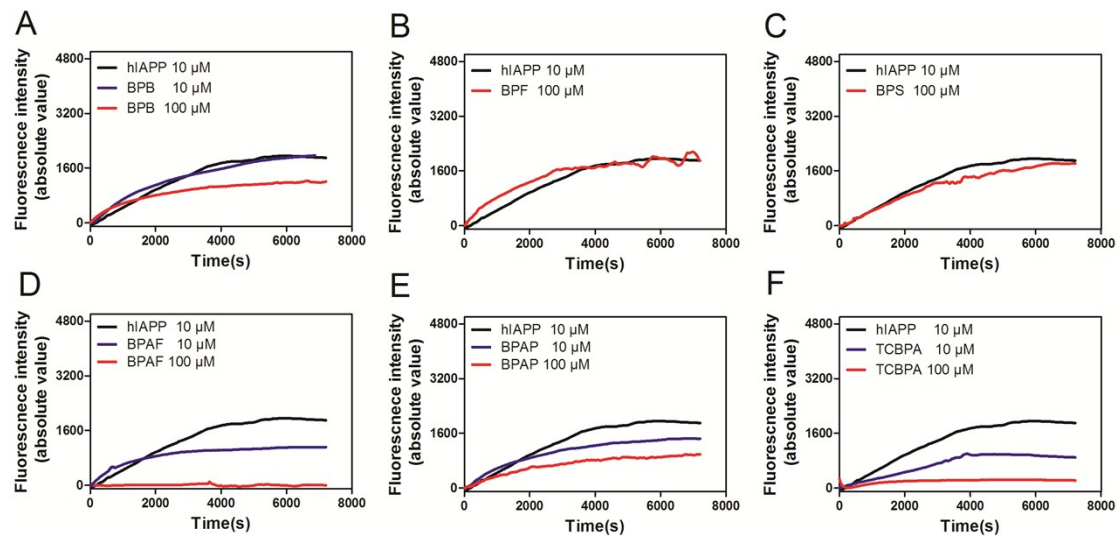

**Figure S1. Effects of BPA analogues on hIAPP aggregation.** ThT-fluorescence of hIAPP with different molar ratio of compounds: (A) BPB; (B) BPF; (C) BPS; (D) BPAF; (E) BPAP; (F) TCBPA.

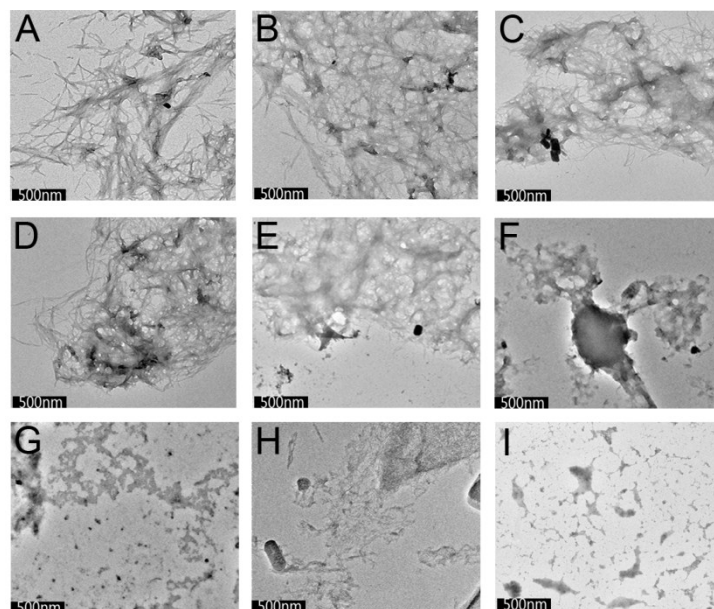

**Figure S2. TEM images of hIAPP co-incubated with different compounds for 1 h.** (A) hIAPP; (B) BPA; (C) BPB; (D) BPF; (E) BPS; (F) BPAF; (G) BPAP; (H) TBBPA; (I) TCBPA. Concentration of hIAPP and compounds was 10  $\mu$ M and 100  $\mu$ M, respectively. Scale bars represent 500 nm.

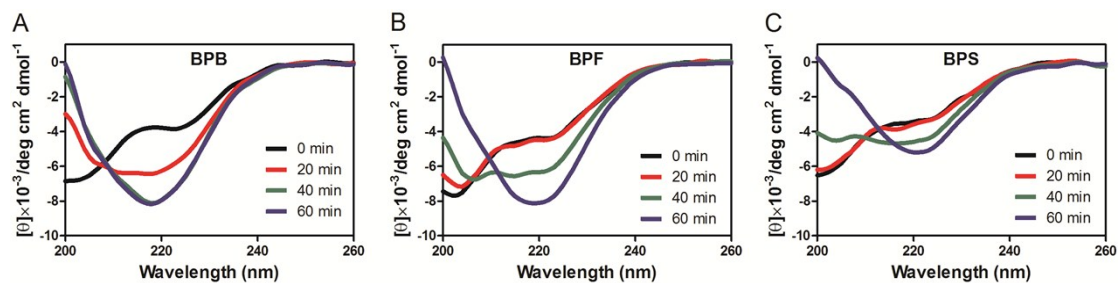

**Figure S3. Far-UV CD spectra of hIAPP with different compounds.** Concentration of hIAPP and compounds was 20  $\mu\text{M}$  and 200  $\mu\text{M}$ , respectively.

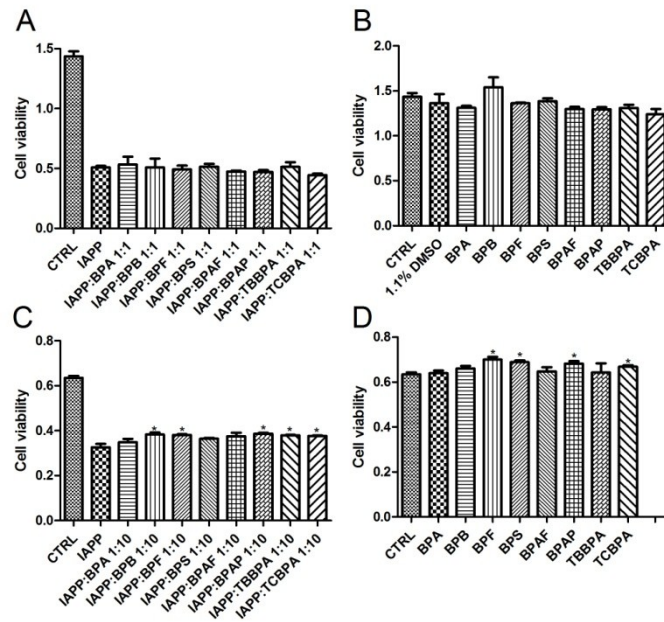

**Figure S4. BxPC3 cell viabilities in the absence and presence of bisphenol analogues as determined by the MTT cell toxicity assay.** hIAPP concentration was 1  $\mu$ M. (A) Cell viability of hIAPP co-incubated with equimolar amount of bisphenol analogues; (B) Cell treated by bisphenol at the concentration of 1  $\mu$ M; (C) Cell viability of hIAPP co-incubated with 10  $\mu$ M of bisphenols; (D) Cell treated by bisphenol analogues at the concentration of 10  $\mu$ M. \*,  $P < 0.05$ .

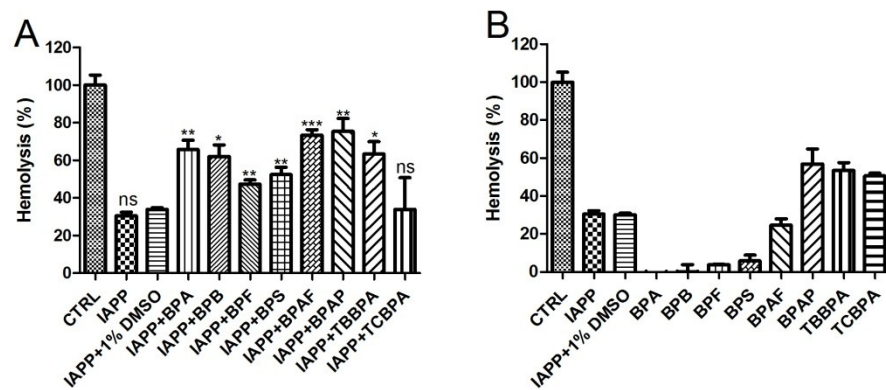

**Figure S5. Haemolysis of erythrocytes induced by hIAPP amyloid and bisphenol analogues.** Concentration of hIAPP and compounds was 10  $\mu$ M and 100  $\mu$ M, respectively. (A) Haemolysis of erythrocytes induced by hIAPP co-incubated with bisphenol analogues. (B) Haemolysis of erythrocytes induced by bisphenol analogues. \*,  $P < 0.05$ ; \*\*,  $P < 0.01$ ; \*\*\*,  $P < 0.001$ .
